# Supplementary material for: Sex Differences in Odds of Brain Metastasis and Outcomes by Brain Metastasis Status after Advanced Melanoma Diagnosis
Source: MDPI journal article supplement (doi:10.3390/cancers16091771), 2024-05-03
Supplement: s1 [file s1]

**Supplemental Table 1: Distribution of demographic and clinical characteristics for patients with advanced melanoma by documentation of brain metastases (2011-2022).**

| Characteristic                                         | Overall<br>N = 7,969 | Brain Metastasis Status                     |                                              | p-value |
|--------------------------------------------------------|----------------------|---------------------------------------------|----------------------------------------------|---------|
|                                                        |                      | No Documentation of<br>BrM, n = 5,175 (65%) | Has Documentation of<br>BrM, n = 2,794 (35%) |         |
| <b>Age at Diagnosis</b>                                |                      |                                             |                                              | <0.001  |
| 0-34                                                   | 265 (3.3%)           | 144 (2.8%)                                  | 121 (4.3%)                                   |         |
| 35-49                                                  | 867 (11%)            | 459 (8.9%)                                  | 408 (15%)                                    |         |
| 50-64                                                  | 2,332 (29%)          | 1,401 (27%)                                 | 931 (33%)                                    |         |
| 65-74                                                  | 2,266 (28%)          | 1,471 (28%)                                 | 795 (28%)                                    |         |
| 75+                                                    | 2,239 (28%)          | 1,700 (33%)                                 | 539 (19%)                                    |         |
| <b>Sex</b>                                             |                      |                                             |                                              | 0.003   |
| Female                                                 | 2,608 (33%)          | 1,752 (34%)                                 | 856 (31%)                                    |         |
| Male                                                   | 5,361 (67%)          | 3,423 (66%)                                 | 1,938 (69%)                                  |         |
| <b>Race</b>                                            |                      |                                             |                                              | 0.93    |
| Asian                                                  | 23 (0.3%)            | 13 (0.3%)                                   | 10 (0.4%)                                    |         |
| Black or African American                              | 41 (0.5%)            | 27 (0.5%)                                   | 14 (0.5%)                                    |         |
| Hispanic or Latino                                     | 3 (<0.1%)            | 2 (<0.1%)                                   | 1 (<0.1%)                                    |         |
| White                                                  | 6,692 (84%)          | 4,358 (84%)                                 | 2,334 (84%)                                  |         |
| Other Race                                             | 551 (6.9%)           | 354 (6.8%)                                  | 197 (7.1%)                                   |         |
| Missing                                                | 659 (8.3%)           | 421 (8.1%)                                  | 238 (8.5%)                                   |         |
| <b>Practice Type</b>                                   |                      |                                             |                                              | 0.138   |
| Academic                                               | 2,163 (27%)          | 1,369 (26%)                                 | 794 (28%)                                    |         |
| Community                                              | 5,688 (71%)          | 3,732 (72%)                                 | 1,956 (70%)                                  |         |
| Both                                                   | 118 (1.5%)           | 74 (1.4%)                                   | 44 (1.6%)                                    |         |
| <b>Diagnosed During or After 2017</b>                  |                      |                                             |                                              | <0.001  |
| No                                                     | 3,703 (46%)          | 2,258 (44%)                                 | 1,445 (52%)                                  |         |
| Yes                                                    | 4,266 (54%)          | 2,917 (56%)                                 | 1,349 (48%)                                  |         |
| <b>Insurance at Advanced Diagnosis</b>                 |                      |                                             |                                              | <0.001  |
| Commercial Health Plan                                 | 1,398 (18%)          | 806 (16%)                                   | 592 (21%)                                    |         |
| Medicaid                                               | 137 (1.7%)           | 70 (1.4%)                                   | 67 (2.4%)                                    |         |
| Medicare (any program)                                 | 1,593 (20%)          | 1,118 (22%)                                 | 475 (17%)                                    |         |
| Other government-sponsored/Patient assistance/Self-pay | 162 (2.0%)           | 112 (2.2%)                                  | 50 (1.8%)                                    |         |
| Multiple documented                                    | 2,834 (36%)          | 1,914 (37%)                                 | 920 (33%)                                    |         |
| Multiple+Other Payer - Type Unknown                    | 1,003 (13%)          | 655 (13%)                                   | 348 (12%)                                    |         |
| Other Payer - Type Unknown                             | 200 (2.5%)           | 116 (2.2%)                                  | 84 (3.0%)                                    |         |
| Unknown                                                | 642 (8.1%)           | 384 (7.4%)                                  | 258 (9.2%)                                   |         |
| <b>Block Group SES index (2015-2019)</b>               |                      |                                             |                                              | 0.033   |
| 1 - Lowest SES                                         | 815 (10%)            | 525 (10%)                                   | 290 (10%)                                    |         |
| 2                                                      | 1,277 (16%)          | 794 (15%)                                   | 483 (17%)                                    |         |
| 3                                                      | 1,593 (20%)          | 1,062 (21%)                                 | 531 (19%)                                    |         |
| 4                                                      | 1,756 (22%)          | 1,156 (22%)                                 | 600 (21%)                                    |         |
| 5 - Highest SES                                        | 1,741 (22%)          | 1,153 (22%)                                 | 588 (21%)                                    |         |
| Unknown                                                | 787 (9.9%)           | 485 (9.4%)                                  | 302 (11%)                                    |         |
| <b>ECOG Performance Score</b>                          |                      |                                             |                                              | <0.001  |
| 0                                                      | 3,138 (39%)          | 2,159 (42%)                                 | 979 (35%)                                    |         |
| 1                                                      | 2,291 (29%)          | 1,412 (27%)                                 | 879 (31%)                                    |         |
| 2+                                                     | 908 (11%)            | 558 (11%)                                   | 350 (13%)                                    |         |
| Unknown                                                | 1,632 (20%)          | 1,046 (20%)                                 | 586 (21%)                                    |         |
| <b>Anatomic Site of Melanoma</b>                       |                      |                                             |                                              | <0.001  |
| Head and Neck                                          | 1,570 (20%)          | 1,086 (21%)                                 | 484 (17%)                                    |         |
| Lower Limb                                             | 961 (12%)            | 657 (13%)                                   | 304 (11%)                                    |         |
| Upper Limb                                             | 736 (9.2%)           | 575 (11%)                                   | 161 (5.8%)                                   |         |
| Overlapping                                            | 352 (4.4%)           | 191 (3.7%)                                  | 161 (5.8%)                                   |         |
| Truncal                                                | 1,774 (22%)          | 1,122 (22%)                                 | 652 (23%)                                    |         |
| Overlapping/Head and Neck                              | 90 (1.1%)            | 55 (1.1%)                                   | 35 (1.3%)                                    |         |
| Truncal/Head and Neck                                  | 117 (1.5%)           | 80 (1.5%)                                   | 37 (1.3%)                                    |         |
| Truncal/Lower Limb                                     | 129 (1.6%)           | 87 (1.7%)                                   | 42 (1.5%)                                    |         |
| Other                                                  | 553 (6.9%)           | 345 (6.7%)                                  | 208 (7.4%)                                   |         |

|                                                              |             |             |             |        |
|--------------------------------------------------------------|-------------|-------------|-------------|--------|
| Unspecified                                                  | 1,663 (21%) | 963 (19%)   | 700 (25%)   |        |
| Unknown                                                      | 24 (0.3%)   | 14 (0.3%)   | 10 (0.4%)   |        |
| <b>Group stage at Initial Diagnosis</b>                      |             |             |             | <0.001 |
| 0                                                            | 33 (0.4%)   | 19 (0.4%)   | 14 (0.5%)   |        |
| I                                                            | 681 (8.5%)  | 428 (8.3%)  | 253 (9.1%)  |        |
| II                                                           | 1,317 (17%) | 889 (17%)   | 428 (15%)   |        |
| III                                                          | 2,074 (26%) | 1,536 (30%) | 538 (19%)   |        |
| IV                                                           | 2,379 (30%) | 1,416 (27%) | 963 (34%)   |        |
| Not documented                                               | 1,485 (19%) | 887 (17%)   | 598 (21%)   |        |
| <b>Had Metastases Outside of the Brain prior to 1L Start</b> |             |             |             | <0.001 |
| Yes                                                          | 6,358 (80%) | 3,795 (73%) | 2,563 (92%) |        |
| No                                                           | 1,611 (20%) | 1,380 (27%) | 231 (8%)    |        |
| <b>History of Positive BRAF Status</b>                       |             |             |             | <0.001 |
| Yes                                                          | 2,381 (30%) | 1,344 (26%) | 1,037 (37%) |        |
| No                                                           | 2,793 (35%) | 1,891 (37%) | 902 (32%)   |        |
| Unknown                                                      | 2,795 (35%) | 1,940 (37%) | 855 (31%)   |        |

---
